# Supplementary material for: Measuring blood glucose before or after lumbar puncture
Source: PeerJ. 2023 Jul 3;11:e15544. doi: 10.7717/peerj.15544 (PMC10324597; doi:10.7717/peerj.15544)
Supplement: Supplemental Information 1 [file peerj-11-15544-s001.xlsx]

## Sheet: Sheet1
number	gender（1=male；2=female	age groud(group A=age<3y;group B=3y≤age<6y;group C=6y≤age<9y;group D=9y≤age≤12y)	The timing of measuring blood glucose before lumbar puncture	Blood glucose levels before lumbarpuncture(mmol/L)	the lumbar puncture time	The timing of measuring blood glucose after lumbar puncture	Blood glucose levels after lumbar puncture(mmol/L)	Cerebrospinal fluid glucose value(mmol/L)	sedation（1=yes;2=no）
1	1	A	2021.04.09 09:24	5.7	2021.09.09 09:25	2021.04.09 09:29	5.6	2.55	1
2	1	A	2021.02.08 12:10	6.3	2021.02.08 12:13	2021.02.08 12:15	6.3	2.71	1
3	1	A	2021.05.28 15:11	6.1	2021.05.28 15:15	2021.05.28 15:20	6.3	2.46	1
4	1	A	2021.03.16 10:26	5.4	2021.03.16 10:30	2021.03.16 10:33	5.6	2.49	1
5	1	A	2021.03.08 09:39	6	2021.03.08 09:41	2021.03.08 09:44	6.3	2.85	1
6	1	A	2021.05.10 10:40	5.7	2021.05.10 10:45	2021.05.10 10:46	6	2.85	1
7	1	A	2021.04.02 09:47	6	2021.04.02 09:48	2021.04.02 09:51	6.5	2.64	1
8	1	A	2021.02.01 09:23	5	2021.02.01 09:27	2021.02.01 09:29	4.9	2.09	1
9	1	A	2021.01.27 10:41	6	2021.01.27 10:43	2021.01.27 10:46	6	2.32	1
10	1	A	2021.02.05 10:13	6.4	2021.02.05 10:17	2021.02.05 10:19	5.9	2.66	1
11	1	A	2021.05.05 09:41	5.3	2021.05.05 09:42	2021.05.05 09:47	4.8	2.67	1
12	1	A	2021.02.07 09:14	5.8	2021.02.07 09:15	2021.02.07 09:17	6	2.35	1
13	1	A	2021.04.06 09:54	5.5	2021.04.06 09:55	2021.04.06 09:57	6	2.28	1
14	1	A	2021.04.19 10:21	5.7	2021.04.19 10:22	2021.04.19 10:23	5.2	2.65	1
15	1	A	2021.02.22 11:01	6	2021.02.22 11:03	2021.02.22 11:05	5.8	2.78	1
16	1	A	2021.02.22 15:04	5.2	2021.02.22 15:07	2021.02.22 15:10	5.2	3.75	1
17	1	A	2021.03.04 09:39	6	2021.03.04 09:44	2021.03.04 09:47	6.3	3.12	1
18	1	A	2021.02.23 10:06	6.3	2021.02.23 10:10	2021.02.23 10:12	6.9	3.17	1
19	1	A	2021.04.03 09:45	6.4	2021.04.03 09:48	2021.04.03 09:49	5.6	3.23	1
20	1	A	2021.03.09 12:15	6.1	2021.03.09 12:17	2021.03.09 12:19	5.9	3.42	1
21	1	A	2021.03.01 09:37	6.3	2021.03.01 09:39	2021.03.01 09:42	6.4	3.21	1
22	1	A	2021.03.02 11:44	6.5	2021.03.02 11:49	2021.03.02 11:52	6.2	3.7	1
23	1	B	2021.09.15 11:29	7.4	2021.09.15 11：32	2021.09.15 11:37	6.7	3.49	1
24	1	B	2021.04.17 09:17	6.8	2021.04.17 09:18	2021.04.17 09:22	6.4	4.1	1
25	1	B	2021.02.06 11:12	6.2	2021.02.06 11:13	2021.02.06 11:14	6.1	3.09	1
26	1	B	2021.02.06 10:37	6.4	2021.02.06 10:42	2021.02.06 10:47	6.4	3.83	1
27	1	B	2021.03.29 12:04	6	2021.03.29 12:05	2021.03.29 12:08	6.3	3.23	1
28	1	B	2021.02.07 09:42	5.3	2021.02.07 09:46	2021.02.07 09:48	5.4	2.5	1
29	1	C	2021.02.01 11:13	4.8	2021.02.01 11:15	2021.02.01 11:19	4.7	3.19	1
30	1	C	2021.04.01 11:20	5.6	2021.04.01 11:21	2021.04.01 11:24	5.7	1.08	1
31	1	D	2021.04.21 10:30	5.5	2021.04.21 10:34	2021.04.21 10:38	5.3	3.56	1
32	1	D	2021.04.21 10:30	5.5	2021.04.21 10:34	2021.04.21 10:38	5.3	3.56	1
33	1	D	2021.05.09 09:37	7.2	2021.05.09 09:37	2021.05.09 09:42	7	3.82	1
34	1	D	2021.03.16 11:04	5.9	2021.03.16 11:07	2021.03.16 11:10	5.4	2.52	1
35	1	D	2021.05.28 16:10	5.7	2021.05.28 16:14	2021.05.28 16:19	5.8	3.16	1
36	1	D	2021.03.12 11:04	4.8	2021.03.12 11:06	2021.03.12 11:10	5.2	2.9	1
37	2	A	2021.02.07 09:32	6.6	2021.02.07 09:33	2021.02.07 09:35	6.4	2.31	1
38	2	A	2021.03.09 09:57	6.4	2021.03.09 10:01	2021.03.09 10:04	5.9	2.51	1
39	2	A	2021.04.08 09:36	5.5	2021.04.08 09:37	2021.04.08 09:38	5.6	3.11	1
40	2	A	2021.02.03 10:38	4.3	2021.02.03 10:41	2021.02.03 10:45	4.4	2.54	1
41	2	A	2021.01.19 10:20	4.6	2021.01.19 10:25	2021.01.19 10:30	5	2.6	1
42	2	A	2021.04.09 09:14	6.1	2021.04.09 09:16	2021.04.09 09:20	6.1	2.17	1
43	2	A	2021.03.05 10:13	5.5	2021.03.05 10:18	2021.03.05 10:19	4.7	2.95	1
44	2	A	2021.02.26 10:38	5.3	2021.02.26 10:39	2021.02.26 10:42	4.6	2.66	1
45	2	A	2021.03.06 09:53	7.3	2021.03.06 09:57	2021.03.06 10:00	7.4	2.86	1
46	2	A	2021.04.09 10:37	5.4	2021.04.09 10:39	2021.04.09 10:41	5.7	3.37	1
47	2	B	2021.02.23 20:46	6.7	2021.02.23 20:47	2021.02.23 20:49	6.8	5.71	1
48	2	B	2021.01.21 11:23	5.2	2021.01.21 11:25	2021.01.21 11:28	5.4	3.14	1
49	2	B	2021.09.13 11:54	4.6	2021.09.13 11:57	2021.09.13 12:02	4.7	2.73	1
50	2	B	2021.01.27 10:55	5.7	2021.01.27 10:56	2021.01.27 10:59	6	3.71	1
51	2	C	2021.05.07 11:20	7.5	2021.05.07 11:20	2021.05.07 11:23	7	4.69	1
52	2	C	2021.05.14 09:24	7.5	2021.05.14 09：25	2021.05.14 09:27	7	4.52	1
53	2	C	2021.02.23 17:16	5.6	2021.02.23 17:18	2021.02.23 17:22	5.3	5.35	1
54	2	C	2021.07.04 08:56	5.1	2021.07.04 08:58	2021.07.04 09:00	5.1	3.06	1
55	2	D	2021.03.08 15:29	6.4	2021.03.08 15:32	2021.03.08 15:36	6	4.31	1
56	2	D	2021.05.07 11:04	7.7	2021.05.07 11:04	2021.05.07 11:07	7.4	2.22	1
57	2	D	2021.07.04 08:37	4.9	2021.07.04 08:40	2021.07.04 08:42	5.1	2.78	1
58	2	D	2021.06.26 09:40	6.8	2021.06.26 09：40	2021.06.26 09:45	7	2.63	1
59	2	D	2021.05.17 11:33	6.3	2021.05.17 11:33	2021.05.17 11:36	6.5	2.31	1
60	1	A	2021.02.18 09:49	5.2	2021.02.18 09:50	2021.02.18 09:53	5.1	2.34	2
61	1	A	2021.03.01 10:43	4.9	2021.03.01 10:46	2021.03.01 10:48	5.3	2.86	2
62	1	A	2021.01.29 16:07	5.6	2021.01.29 16:11	2021.01.29 16:15	5.1	2.73	2
63	1	A	2021.02.19 10:35	5.3	2021.02.19 10:39	2021.02.19 10:43	5.1	2.58	2
64	1	A	2021.03.05 09:30	5.2	2021.03.05 09:33	2021.03.05 09:36	6.1	2.4	2
65	1	A	2021.02.22 09:42	6.8	2021.02.22 09:45	2021.02.22 09:48	6.6	3.08	2
66	1	A	2021.03.17 10:24	6.5	2021.03.17 10:25	2021.03.17 10:30	6.3	3.32	2
67	1	B	2021.04.21 10:03	4.6	2021.04.21 10:04	2021.04.21 10:09	3.8	2.84	2
68	1	B	2021.04.25 10:03	4.6	2021.04.25 10:04	2021.04.25 10:09	3.8	2.84	2
69	1	B	2021.04.29 10:03	4.6	2021.04.29 10:04	2021.04.29 10:08	4.6	3.09	2
70	1	B	2021.04.01 10:27	5.9	2021.04.01 10:29	2021.04.01 10:32	5.7	3.15	2
71	1	C	2021.01.22 14:52	6.2	2021.01.22 14:56	2021.01.22 15:00	5.7	3.58	2
72	1	C	2021.07.16 05:04	6.6	2021.07.16 05:05	2021.07.16 05:08	6.7	4.04	2
73	1	C	2021.07.02 11:34	5.9	2021.07.02 11:35	2021.07.02 11:37	5.8	2.87	2
74	1	C	2021.06.16 11:35	4.8	2021.06.16 11:35	2021.06.16 11:40	5.3	3.13	2
75	1	D	2021.05.27 10:31	6.2	2021.05.27 10:32	2021.05.27 10:36	6	3.57	2
76	1	D	2021.07.24 10:07	4.9	2021.07.24 10:11	2021.07.24 10:14	5.2	2.55	2
77	1	D	2021.08.26 10:51	5.9	2021.08.26 10:53	2021.08.26 10:57	6.1	2.44	2
78	1	D	2021.03.11 09:07	10	2021.03.11 09:09	2021.03.09 09:11	10	3.32	2
79	1	D	2021.03.08 11:42	5.5	2021.03.08 11:47	2021.03.08 11:52	5.4	3.16	2
80	2	C	2021.04.15 10:55	8	2021.04.15 10:56	2021.04.15 11:00	7.3	3.29	2
81	2	D	2021.02.24 10:43	6.4	2021.02.24 10:47	2021.02.24 10:50	5.8	2.82	2
82	2	D	2021.05.27 10:15	6	2021.05.27 10:17	2021.05.27 10:20	5.8	2.4	2
83	2	D	2021.04.01 15:44	6	2021.04.01 15:49	2021.04.01 15:53	6.2	1.28	2
84	2	D	2021.04.18 09:45	5.4	2021.04.18 09:47	2021.04.18 09:52	4.6	3.17	2
85	2	D	2021.02.28 10:50	6.2	2021.02.28 10:53	2021.02.28 10:56	6.2	3.03	2
86	2	D	2021.07.25 10:02	5.3	2021.07.25 10:05	2021.07.25 10:09	5.4	3.45	2
87	2	D	2021.05.30 10:25	5.3	2021.05.30 10:30	2021.05.30 10:33	5.5	2.1	2
88	1	A	2021.01.29 10:30	5.1	2021.01.29 10:32	2021.01.29 10:36	5.7	1.7	2
89	1	A	2021.06.14 11:10	6.3	2021.06.14 11:10	2021.06.14 11:13	5.7	3.55	2
90	1	A	2021.03.30 11:00	6.7	2021.03.30 11:03	2021.03.30 11:07	5.9	2.79	2
91	1	A	2021.03.05 10:29	6.7	2021.03.05 10:30	2021.03.05 10:31	6.5	3.39	2
92	1	A	2021.01.22 10:12	5.9	2021.01.22 10:15	2021.01.22 10:19	6.5	3.14	2
93	1	A	2021.03.16 10:03	6	2021.03.16 10:07	2021.03.16 10:10	5.9	2.81	2
94	1	A	2021.03.30 11:18	6.2	2021.30.30 11:21	2021.03.30 11:23	5.9	3.51	2
95	1	A	2021.01.22 14:59	5.7	2021.01.22 15:03	2021.01.22 15:08	5.7	3.56	2
96	1	C	2021.07.25 10:42	5.6	2021.07.25 10:45	2021.07.25 10:47	5.4	2.82	2
97	2	A	2021.03.25 10:54	6.2	2021.03.25 10:57	2021.03.25 11:00	6	2.53	2
98	2	A	2021.03.16 12:46	5.5	2021.03.16 12:50	2021.03.16 12:54	6	2.65	2
99	2	A	2021.03.07 09:52	4.4	2021.03.07 09:53	2021.03.07 09:57	5.3	2.19	2
100	2	A	2021.02.01 15:49	5.3	2021.02.01 15:53	2021.02.01 15:57	5.6	3.62	2
101	2	B	2021.04.19 14:23	5.7	2021.04.19 14:25	2021.04.19 14:28	6.1	4.24	2
